# Supplementary material for: Trypanosoma cruzi-specific IFN-γ-producing cells in chronic Chagas disease associate with a functional IL-7/IL-7R axis
Source: PLOS journal article supplement (doi:10.1371/journal.pntd.0006998), 2018-12-05
Supplement: S6 (10.1371/journal.pntd.0006998.s006) [file journal.pntd.0006998.s006]

**S1 Table. Cytokines serum levels in chronic Chagas disease patients**

| Cytokine <sup>A</sup>    | G0 <sup>B</sup> |    | G1                 |                 | G2-G3              |                 | UI  |
|--------------------------|-----------------|----|--------------------|-----------------|--------------------|-----------------|-----|
|                          | P               | NP | P                  | NP              | P                  | NP              |     |
| IL-1 $\beta$<br>(pg/mL)  | ND              | ND | ND                 | ND              | ND                 | ND              | ND  |
| IL-9<br>(ng/mL)          | ND              | ND | 0.10 (0 –<br>2.01) | 0 (0 –<br>2.10) | 0.07 (0 –<br>1.40) | 0 (0 –<br>0.57) | ND  |
| IL-10<br>(pg/mL)         | ND              | ND | ND                 | ND              | ND                 | ND              | ND  |
| IL-12<br>(pg/mL)         | ND              | ND | ND                 | ND              | ND                 | ND              | ND  |
| TNF- $\alpha$<br>(pg/mL) | ND              | ND | ND                 | ND              | 0 (0 – 6.57)       | ND              | ND) |

<sup>A</sup> Serum levels of IL-9 were measured by ELISA and IL-1 $\beta$ , IL-10, IL-12 and TNF- $\alpha$  by CBA.

<sup>B</sup> Values are expressed as medians (interquartile range). ND non-detected, limits of detection: ELISA, 0.1 ng/mL; CBA IL-1 $\beta$  7,2 pg/mL; IL-10 3,3 pg/mL; IL-12 1,9 pg/mL; TNF- $\alpha$  3,7 pg/mL
